# Supplementary material for: The reaction fragility spectrum
Source: Royal Society of Chemistry journal article supplement (doi:10.1039/c6cp06519h), 2016-01-01
Supplement: c6cp06519h1.pdf [file c6cp06519h1.pdf]

## The Reaction Fragility Spectrum

Ludwik Komorowski,<sup>a\*</sup> Piotr Ordon<sup>b</sup> and Mateusz Jędrzejewski<sup>a</sup>

<sup>a</sup> Department of Physical and Quantum Chemistry, Wrocław University of Science and Technology, Wyb. Wyspiańskiego 27, 50-370 Wrocław, Poland. E-mail: ludwik.komorowski@pwr.edu.pl.

<sup>b</sup> Department of Physics and Biophysics, Wrocław University of Environmental and Life Sciences, ul. Norwida 25, 50-375 Wrocław, Poland. E-mail: piotr.ordon@up.wroc.pl.

\* Corresponding author.

### Electronic Supplementary Information

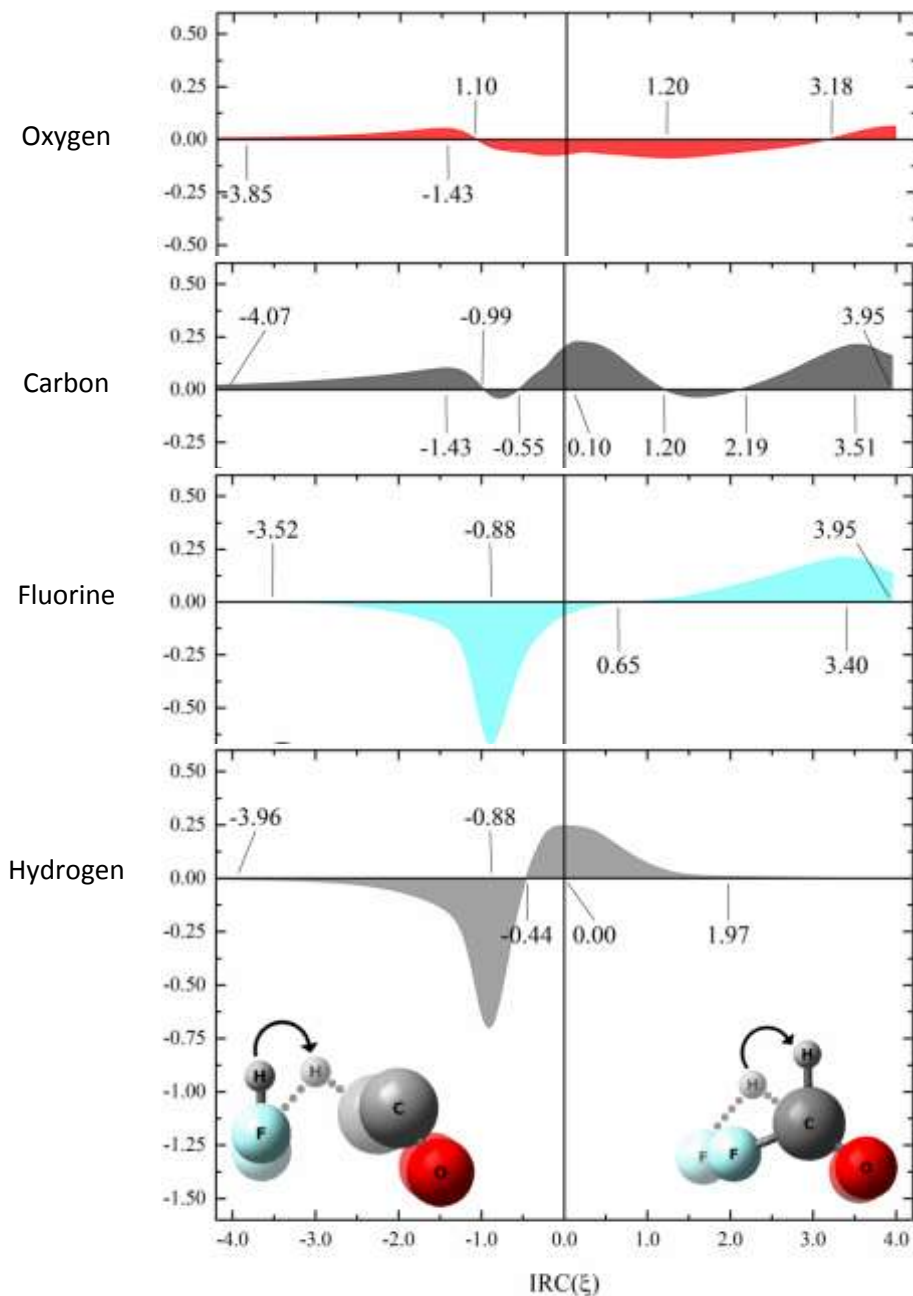

Figure 4  
Reaction fragility spectra for individual atoms; reaction HF/CO. The peak positions and the limits for the peak integration have been marked.

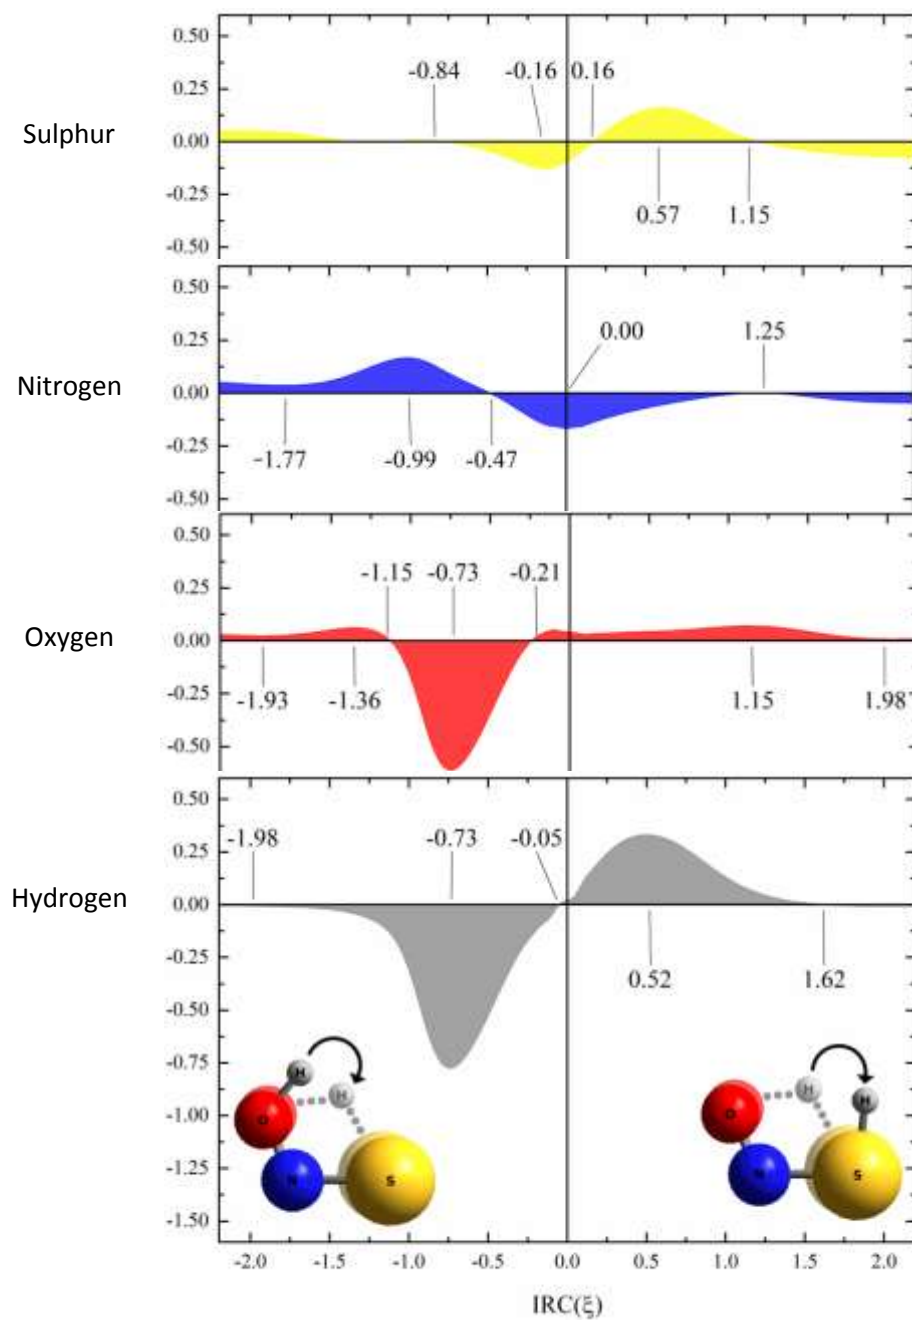

Figure 5  
Reaction fragility spectra for individual atoms; reaction H/ONS. The peak positions and the limits for the peak integration have been marked.

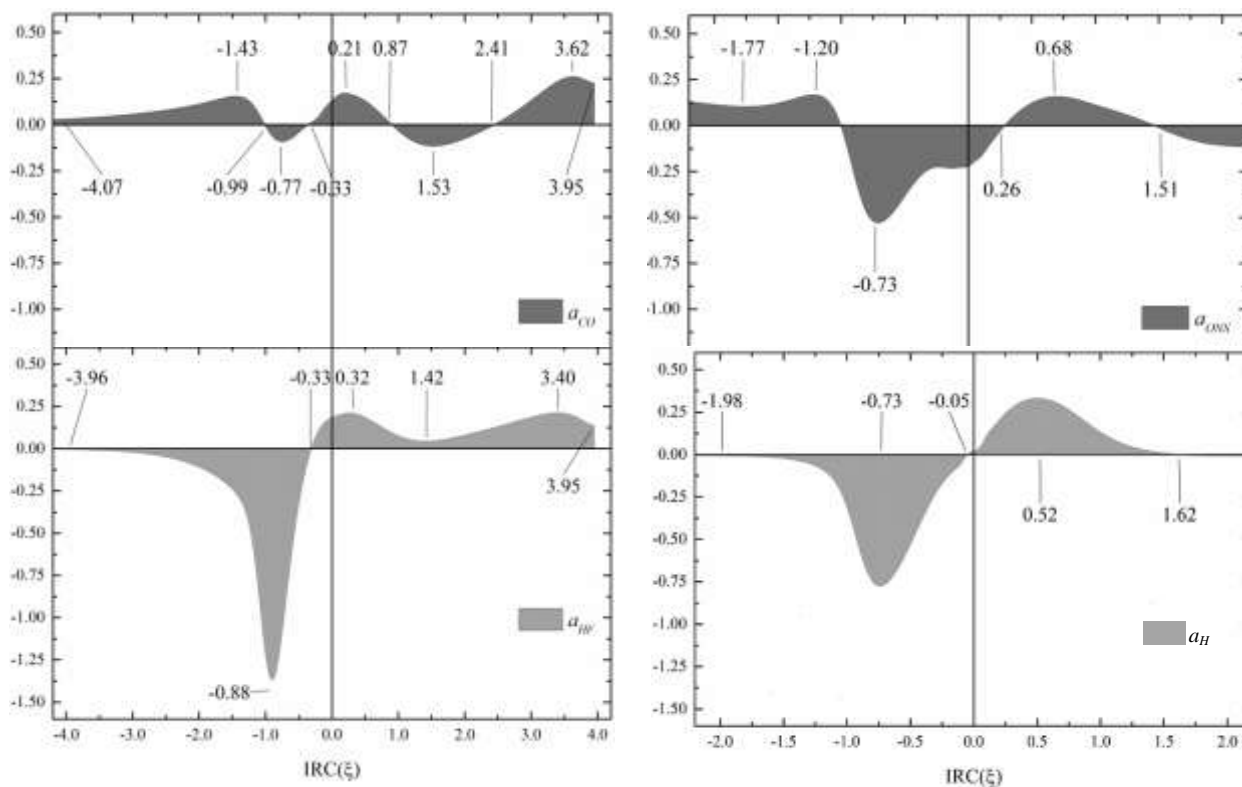

a)

b)

Figure 6

Reaction fragility spectrum for the group components; a) HF/CO; b) H/ONS.

The peak positions and the limits for the peak integration have been marked.

**Table 1**

Analysis of the atomic spectral peaks shown in Figure 4 and 5, as well as for the group spectra in Figure 6. Positions of the peak maximum ( $\xi_{max/min}$ ), the peak integral ( $\Delta k^A$ ), the change in atomic population over the peak region ( $\Delta N_A$ , Mulliken) and the average atomic softening index ( $\bar{\lambda}^A = \Delta k^A / \Delta N_A$ ) for the peak region calculated from eq. 9 (atomic units).

| Reaction | Atom/Group | $\xi_{max/min}$ | $\Delta k^A$ | $\Delta N_A$ | $\bar{\lambda}^A$ |
|----------|------------|-----------------|--------------|--------------|-------------------|
| HF/CO    | O          | -1.43           | -0.0588      | 0.1464       | -0.4019           |
|          |            | 1.20            | -0.1124      | 0.0906       | -1.2399           |
|          | C          | -1.43           | 0.1743       | -0.1326      | -1.3145           |
|          |            | 0.10            | 0.2369       | -0.3872      | -0.6119           |
|          |            | 3.51            | 0.2371       | 0.0216       | 10.9977           |
|          | F          | -0.88           | -0.5325      | 0.2156       | -2.4696           |
|          |            | 3.40            | 0.3385       | -0.2987      | -1.1332           |
|          | H          | -0.88           | -0.4720      | 0.1159       | -4.0717           |
|          |            | 0.00            | 0.2888       | 0.3530       | 0.8182            |
|          | CO         | -1.43           | 0.2474       | -0.0594      | -4.1656           |
|          |            | -0.77           | -0.0401      | -0.2467      | 0.1626            |
|          |            | 0.21            | 0.1373       | -0.2229      | -0.6161           |
|          |            | 1.53            | -0.1145      | -0.0092      | 12.5081           |
|          |            | 3.62            | 0.2447       | 0.0918       | 2.6653            |
|          | HF         | -0.88           | -0.9449      | 0.3072       | -3.0757           |
|          |            | 0.32            | 0.2292       | 0.2402       | 0.9540            |
| 3.40     |            | 0.3446          | -0.1000      | -3.4474      |                   |
| H/ONS    | S          | -0.16           | -0.0633      | -0.0605      | 1.0459            |
|          |            | 0.57            | 0.0983       | -0.0879      | -1.1182           |
|          | N          | -0.99           | 0.1176       | -0.0467      | -2.5176           |
|          |            | 0.00            | -0.1276      | -0.0217      | 5.8764            |
|          | O          | -1.36           | 0.0322       | -0.0391      | -0.8233           |
|          |            | -0.73           | -0.2884      | -0.0500      | 5.7643            |
|          |            | 1.15            | 0.0948       | -0.1162      | -0.8156           |
|          | H          | -0.73           | -0.4739      | 0.1382       | -3.4286           |
|          |            | 0.52            | 0.2613       | 0.2149       | 1.2161            |
|          | ONS        | -1.20           | 0.0976       | -0.0146      | -6.6955           |
| -0.73    |            | -0.3602         | -0.1800      | 2.0019       |                   |
| 0.68     |            | 0.1135          | -0.1532      | -0.7411      |                   |
